# Supplementary material
Source: PubMed Central journal article supplement (PMC1065716)
Supplement: pnas_102_11_4068__2.pdf [file pnas_102_11_4068__2.pdf]

**A****Fraction III**

Primer J-14

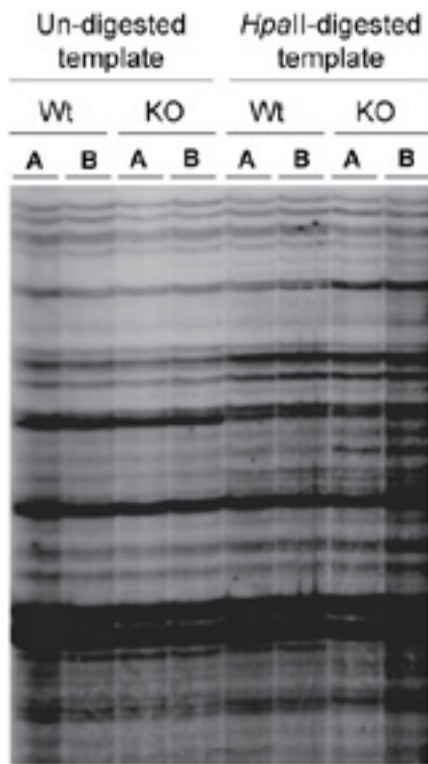

← Digestion dependent marker  
(methylation polymorphism)

**B****Fraction III**

Primer AE-11

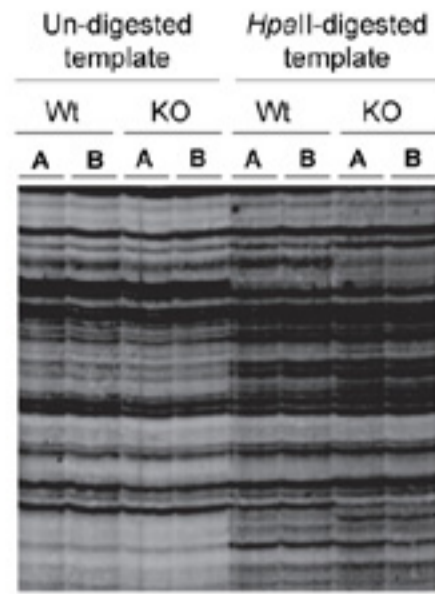

← Digestion dependent marker  
(methylation polymorphism)

**C****Fraction III**

Primer AE-11

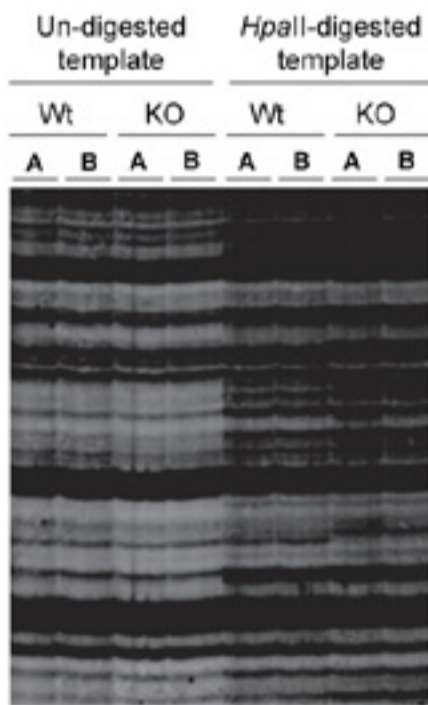

← Digestion dependent marker  
← Digestion dependent marker  
← Digestion resistant marker  
(methylation polymorphisms)

**D****Fraction III**

Primer AE-11

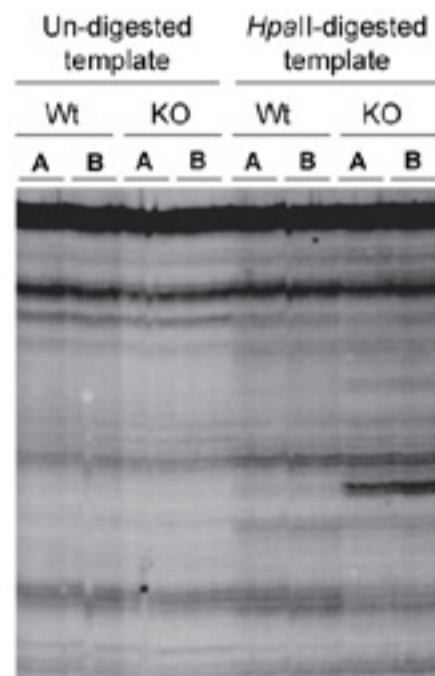

← Digestion dependent marker  
← Digestion dependent marker  
(methylation polymorphisms)

**E****Fraction III**

Primer AE-11

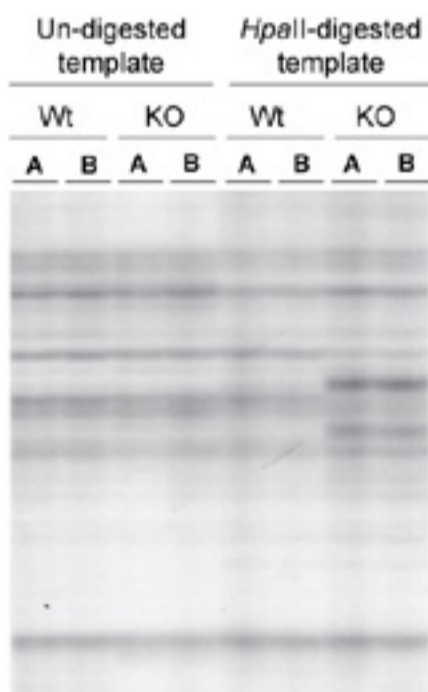

← Digestion dependent markers  
(methylation polymorphisms)
