# Supplementary material
Source: PubMed Central journal article supplement (PMC1065716)

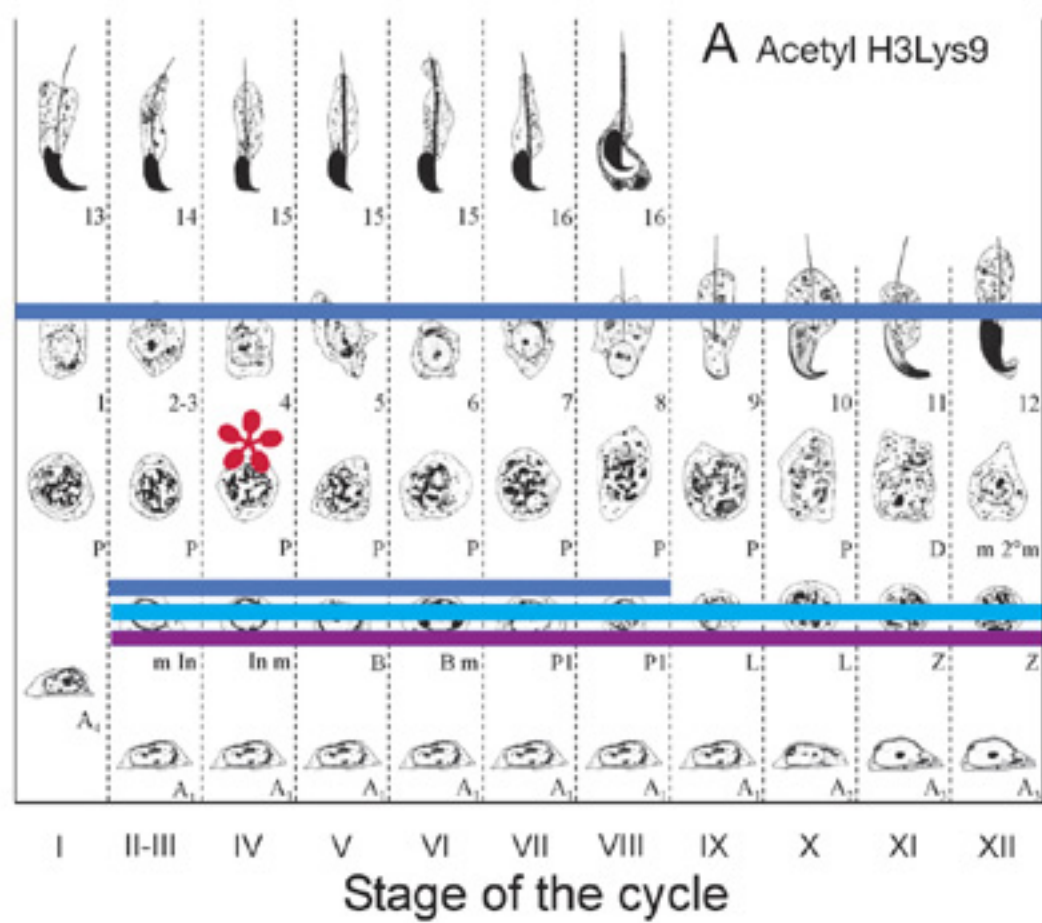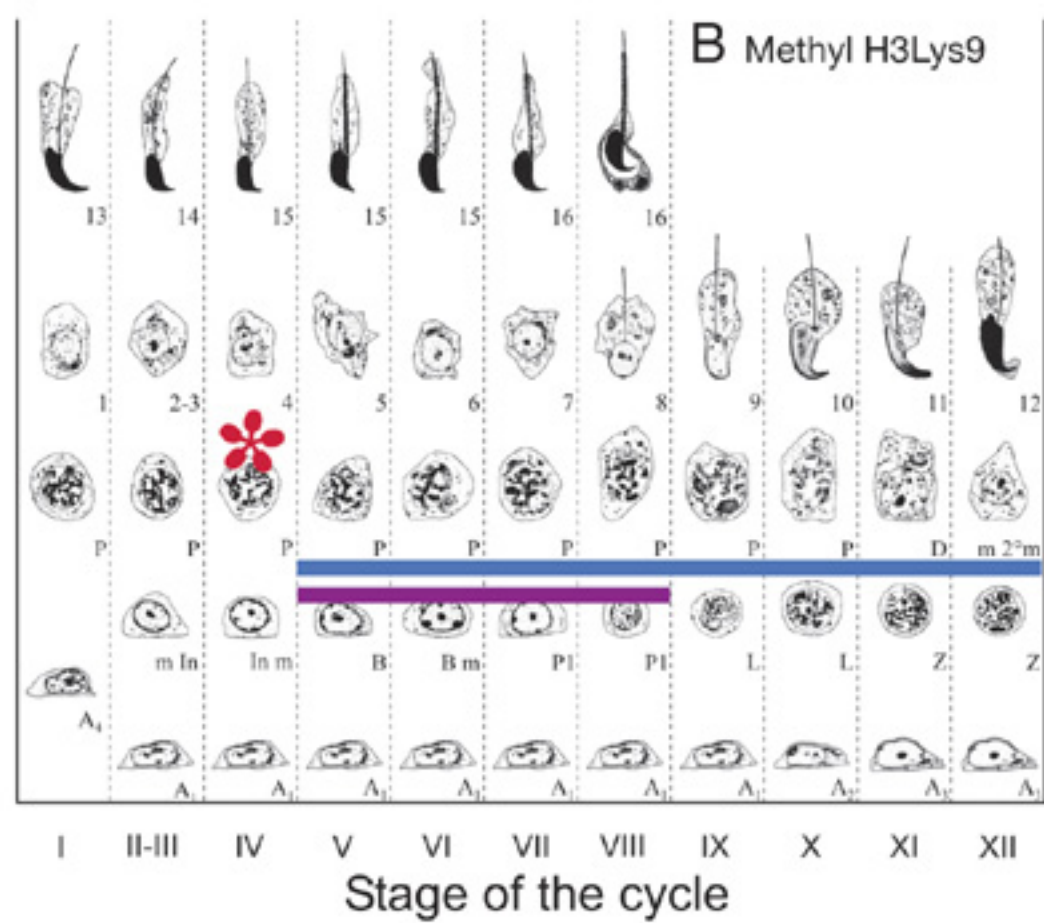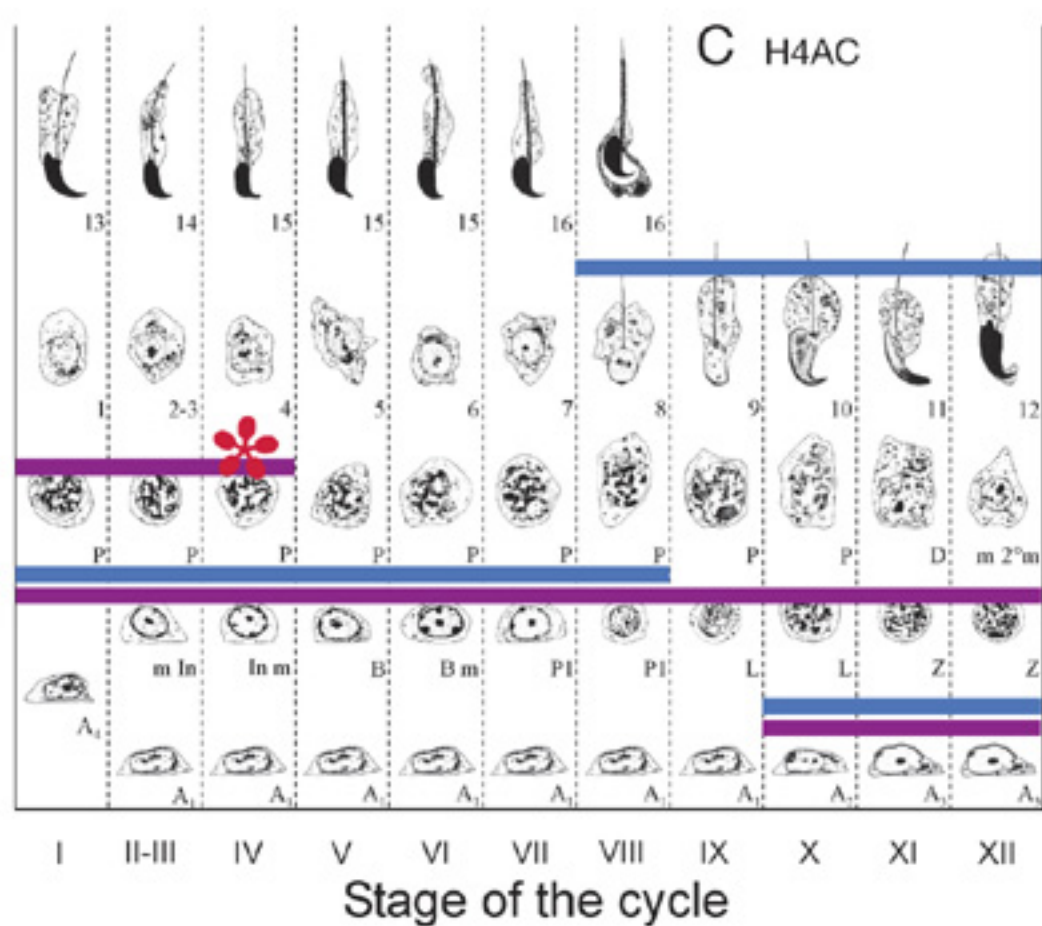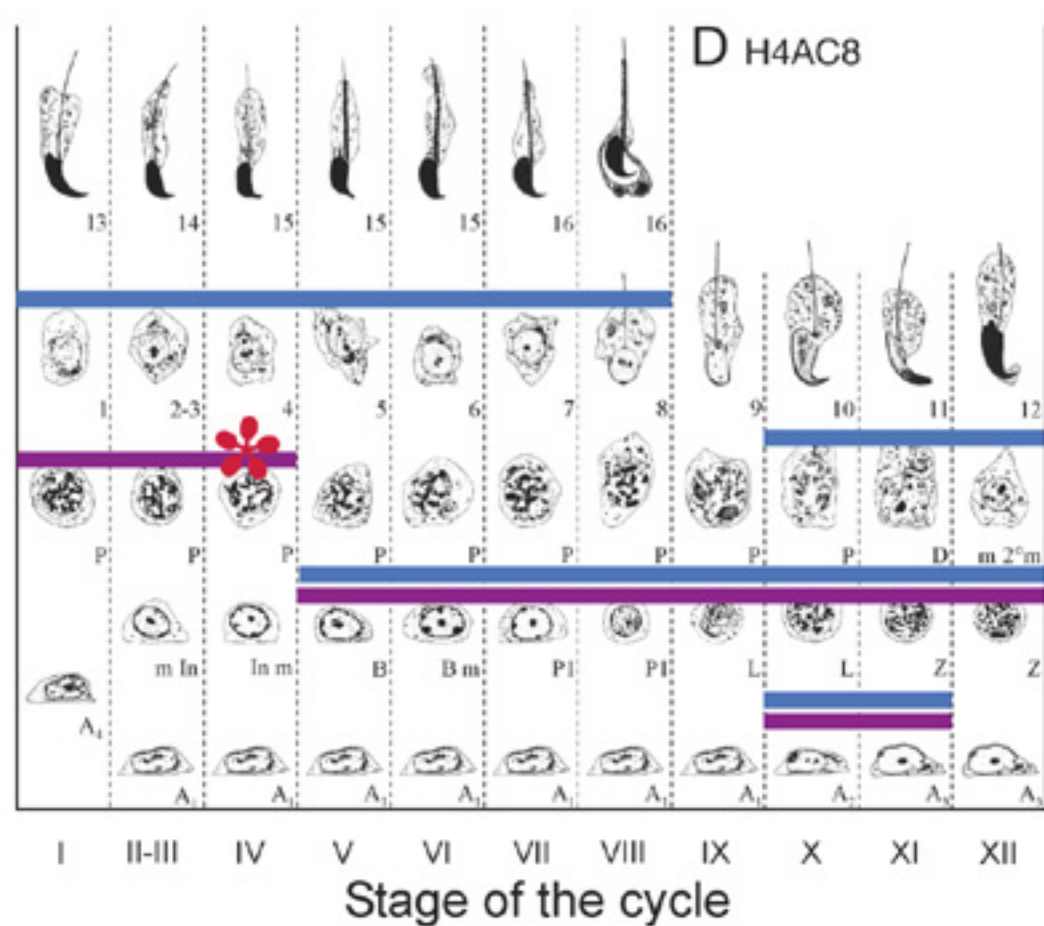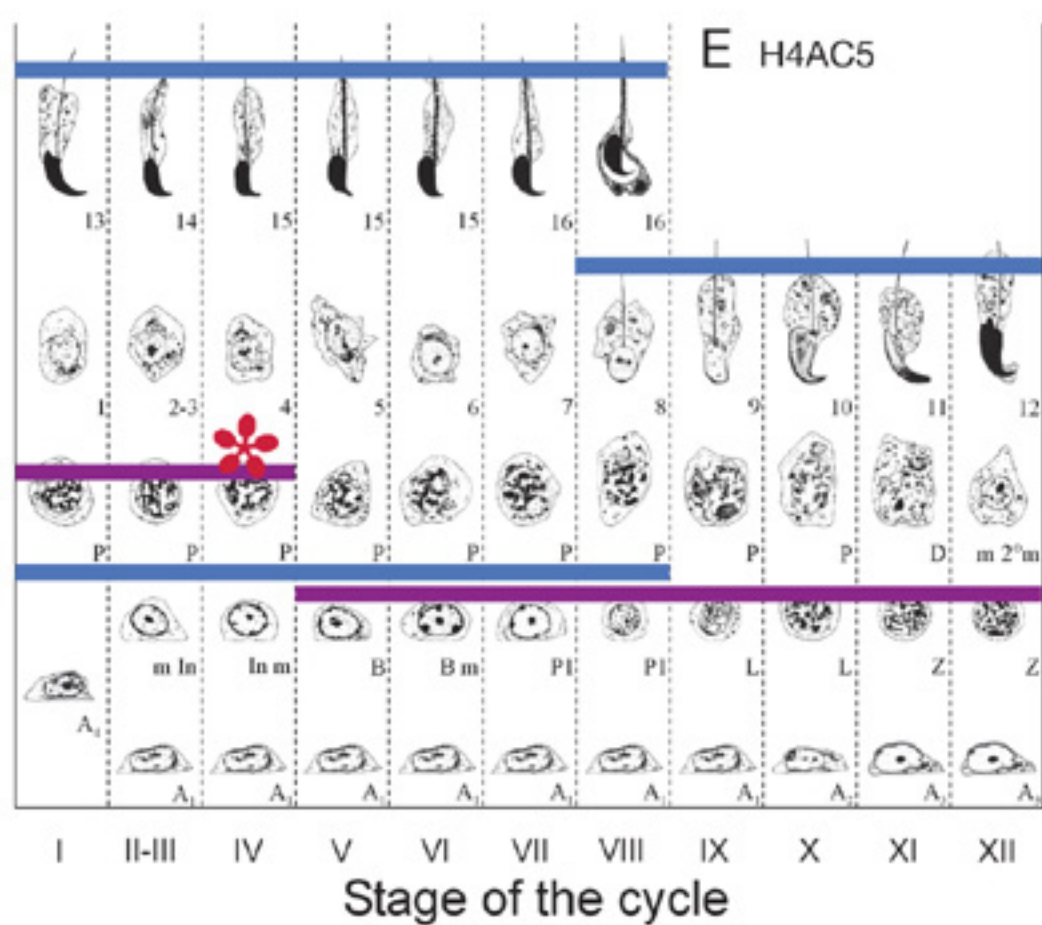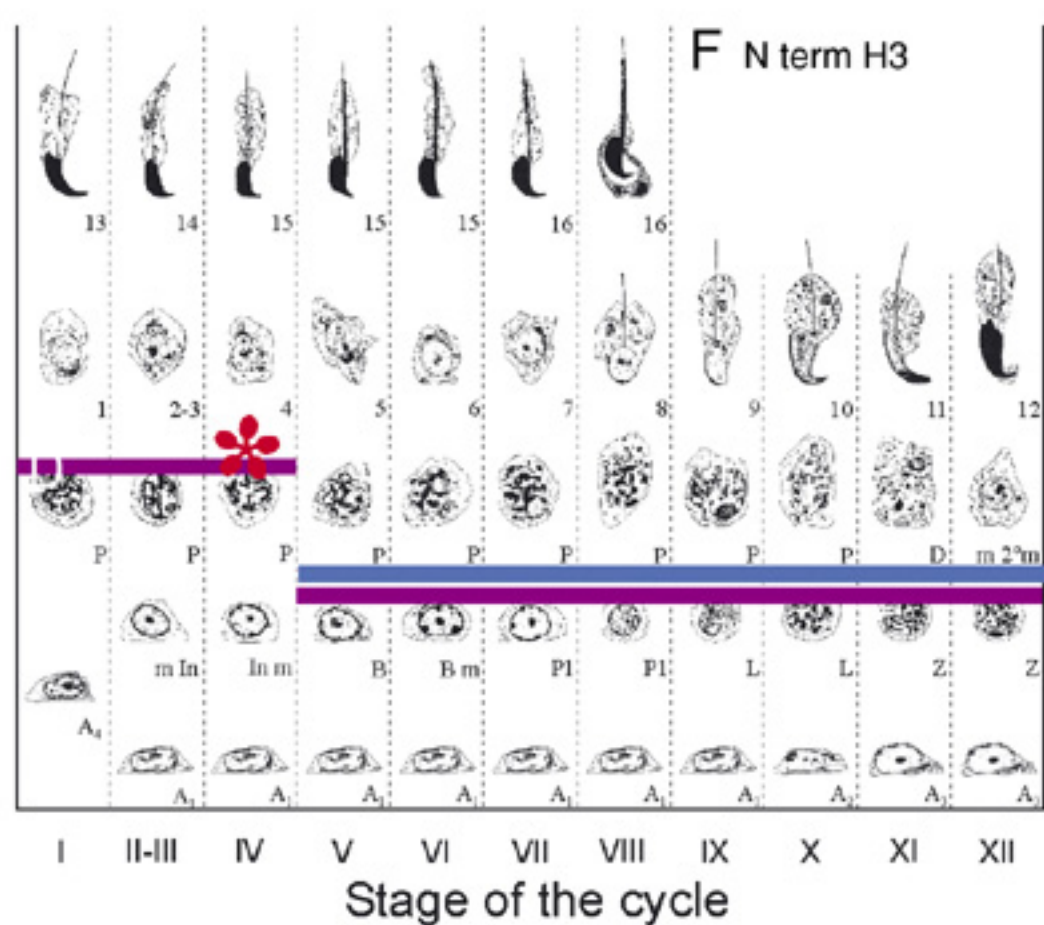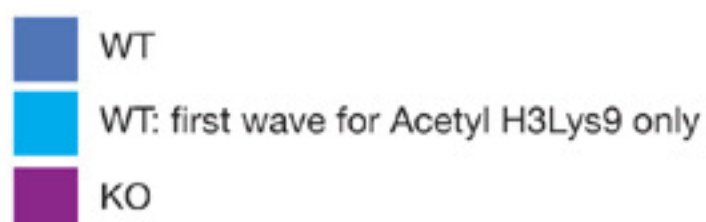

Supplement: pnas_102_11_4068__3.pdf [file pnas_102_11_4068__3.pdf]
